# Supplementary material for: Noxa upregulation by oncogenic activation of MEK/ERK through CREB promotes autophagy in human melanoma cells
Source: PubMed Central journal article supplement (PMC4294377; doi:10.18632/oncotarget.2616), 2014-10-21
Supplement: oncotarget-05-11237-s001.pdf [file oncotarget-05-11237-s001.pdf]

# Noxa upregulation by oncogenic activation of MEK/ERK through CREB promotes autophagy in human melanoma cells

## Supplementary Material

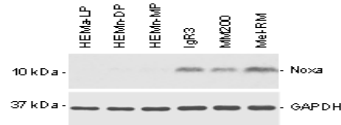

**Supplementary Figure S1: Melanocyte lines of different origins express similarly lower levels of Noxa than melanoma cell lines. Whole cell lysates from HEMa-LP, HEMn-DP, HEMn-MP melanocytes and IgR3, MM200, Mel-RM melanoma cells were subjected to western blot analysis. Data shown are representative of three individual experiments.**

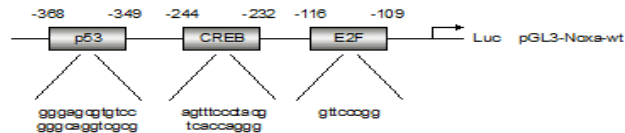

**Supplementary Figure S2: A schematic illustration of the bind sites of p53, CREB, and E2F at the Noxa promoter.**

**Supplementary Table S1: Summary of melanocytic tumors and their positivity for Noxa<sup>a</sup>**

| Melanocytic tumors                 | Number | Noxa expression levels (IRS) <sup>b</sup> | % Noxa positive cells                |
|------------------------------------|--------|-------------------------------------------|--------------------------------------|
| Compound Nevus                     | 10     | 4.2                                       | 41 <sup>c</sup> (21-65) <sup>d</sup> |
| Dysplastic Nevus                   | 10     | 4.7                                       | 57 (17-90)                           |
| Thin Primary (<1mm Breslow depth)  | 20     | 5.7                                       | 60 (0-90)                            |
| Thick Primary (>1mm Breslow depth) | 20     | 8.0                                       | 74 (40-97)                           |
| Lymph Node Metastases              | 20     | 7.9                                       | 82 (30-100)                          |
| Distant Metastases                 | 20     | 10.0                                      | 72 (0-100)                           |

<sup>a</sup> The cohort of the melanocytic tumors used in this study was the same to that reported before (30).

<sup>b</sup> IRS: Immunoreactive score.

<sup>c</sup> Numbers stand for the mean percentage of positive cells.

<sup>d</sup> Numbers in brackets represent the range of positive cells.
